# Supplementary material
Source: PubMed Central journal article supplement (PMC8012229)
Supplement: NIHMS1661159-supplement-Supplemental_Table.pdf [file NIHMS1661159-supplement-Supplemental_Table.pdf]

**Supplemental table 1: General characteristics of clinical characteristics of excluded versus included data**

| ..                          | <b>Included Data</b> | <b>Excluded Data</b> | ..                         |
|-----------------------------|----------------------|----------------------|----------------------------|
| ..                          | <b>n (%)</b>         | <b>n (%)</b>         | <b>p-value<sup>A</sup></b> |
| <b>Outcome Total</b>        | 215937 (%)           | 9514 (%)             | ..                         |
| <b>Age Median (IQR)</b>     | 23·0 (19·0, 28·0)    | 23·0 (20·0, 29·0)    | <0·001                     |
| Under 20                    | 58759 (27·2%)        | 2323 (24·4%)         | ..                         |
| 20-29                       | 112721 (52·2%)       | 5013 (52·7%)         | ..                         |
| 30 or Older                 | 44452 (20·6%)        | 2178 (22·9%)         | ..                         |
| Unknown                     | 5 (<1%)              | 0 (0·0%)             | ..                         |
| <b>Self-Identified Race</b> | ..                   | ..                   | <0·001                     |
| White                       | 67076 (31·1%)        | 2027 (21·3%)         | ..                         |
| Black                       | 25731 (11·9%)        | 873 (9·2%)           | ..                         |
| Mixed or Indigenous         | 106860 (49·5%)       | 4051 (42·6%)         | ..                         |
| Unknown                     | 16270 (7·5%)         | 2563 (26·9%)         | ..                         |
| <b>Education</b>            | ..                   | ..                   | <0·001                     |
| Some Primary School         | 66053 (30·6%)        | 2004 (21·1%)         | ..                         |
| Some Secondary School       | 50862 (23·6%)        | 1294 (13·6%)         | ..                         |
| HS Graduate or Higher       | 40134 (18·6%)        | 1047 (11·0%)         | ..                         |
| Unknown                     | 58888 (27·3%)        | 5169 (54·3%)         | ..                         |
| <b>Population Density</b>   | ..                   | ..                   | <0·001                     |
| Urban                       | 67076 (31·1%)        | 2027 (21·3%)         | ..                         |
| Rural or Periurban          | 25731 (11·9%)        | 873 (9·2%)           | ..                         |
| Unknown                     | 106860 (49·5%)       | 4051 (42·6%)         | ..                         |

A. p- value obtained from Kruskal-Wallis tests for continuous variables, and  $\chi^2$  tests for categorical variables

**Supplemental table 2: Clinical characteristics of excluded versus included data**

| ..                       | <b>Included Data</b> | <b>Excluded Data</b> | ..                         |
|--------------------------|----------------------|----------------------|----------------------------|
| ..                       | <b>n (%)</b>         | <b>n (%)</b>         | <b>p-value<sup>A</sup></b> |
| <b>Outcome Total</b>     | 215937               | 9514                 | ..                         |
| <b>Prenatal Care</b>     | ..                   | ..                   | <0.001                     |
| No Prenatal Care         | 16899 (7.8%)         | 2760 (29.0%)         | ..                         |
| Received Prenatal Care   | 199038 (92.2%)       | 6754 (71.0%)         | ..                         |
| <b>Syphilis Titer</b>    | ..                   | ..                   | <0.001                     |
| <16                      | 116782 (54.1%)       | 5989 (62.9%)         | ..                         |
| ≥16                      | 99155 (45.9%)        | 3525 (37.1%)         | ..                         |
| <b>Term of Diagnosis</b> | ..                   | ..                   | <0.001                     |
| First Term               | 68836 (31.9%)        | 1703 (17.9%)         | ..                         |
| Second Term              | 63079 (29.2%)        | 1646 (17.3%)         | ..                         |
| Third Term or Later      | 83808 (38.8%)        | 6154 (64.7%)         | ..                         |
| Unknown                  | 214 (0.1%)           | 11 (0.1%)            | ..                         |

A. p-value obtained from Kruskal-Wallis tests for continuous variables, and  $\chi^2$  tests for categorical variables
